# Supplementary material
Source: publisher site journal article supplement (https://www.kjim.org/upload/media/kjim-2025-052-Supplementary-Table-1.pdf)
Supplement: Supplementary file 1 [file kjim-2025-052-Supplementary-Table-1.pdf]

**Supplementary Table 1. Number of events according to treatment group by subgroups**

| Subgroup                                     | IS/SE            |          |       | Major bleeding   |          |        |
|----------------------------------------------|------------------|----------|-------|------------------|----------|--------|
|                                              | No anticoagulant | Warfarin | DOAC  | No anticoagulant | Warfarin | DOAC   |
| Age (yr)                                     |                  |          |       |                  |          |        |
| ≤ 70                                         | 12/419           | 2/103    | 0/38  | 23/419           | 19/103   | 5/38   |
| >70                                          | 12/185           | 3/94     | 4/94  | 28/185           | 14/94    | 12/94  |
| Sex                                          |                  |          |       |                  |          |        |
| Female                                       | 10/227           | 0/56     | 4/58  | 22/227           | 11/56    | 10/58  |
| Male                                         | 14/377           | 5/141    | 0/74  | 29/377           | 22/141   | 7/74   |
| Body weight (kg)                             |                  |          |       |                  |          |        |
| ≤ 60                                         | 9/240            | 2/81     | 2/73  | 16/240           | 14/81    | 10/73  |
| > 60                                         | 8/238            | 2/91     | 1/44  | 16/238           | 13/91    | 2/44   |
| CHA <sub>2</sub> DS <sub>2</sub> -VASc score |                  |          |       |                  |          |        |
| ≤ 3                                          | 10/342           | 1/71     | 0/38  | 25/342           | 11/71    | 3/38   |
| >3                                           | 14/262           | 4/126    | 4/94  | 26/262           | 22/126   | 14/94  |
| Prior stroke                                 |                  |          |       |                  |          |        |
| No                                           | 19/542           | 2/148    | 2/116 | 43/542           | 23/148   | 12/116 |
| Yes                                          | 5/62             | 3/49     | 2/16  | 8/62             | 10/49    | 5/16   |
| Diabetes mellitus                            |                  |          |       |                  |          |        |
| No                                           | 15/364           | 2/123    | 4/83  | 26/364           | 20/123   | 12/83  |
| Yes                                          | 9/240            | 3/74     | 0/49  | 25/240           | 13/74    | 5/49   |
| Heart failure                                |                  |          |       |                  |          |        |
| No                                           | 15/341           | 3/82     | 1/53  | 33/341           | 15/82    | 8/53   |
| Yes                                          | 9/263            | 2/115    | 3/79  | 18/263           | 18/115   | 9/79   |
| Anti platelet drug                           |                  |          |       |                  |          |        |
| No                                           | 8/298            | 4/130    | 3/104 | 21/298           | 17/130   | 15/104 |
| Yes                                          | 16/306           | 1/67     | 1/28  | 30/306           | 16/67    | 2/28   |

Event number/total subgroup number is presented.

IS/SE, ischemic stroke/systemic embolism; DOAC, direct oral anticoagulant.
